# Supplementary material for: Removal of lithium and uranium from seawater using fly ash and slag generated in the CFBC technology
Source: Royal Society of Chemistry journal article supplement (doi:10.1039/d0ra09092a), 2021-01-01
Supplement: d0ra09092a1.pdf [file d0ra09092a1.pdf]

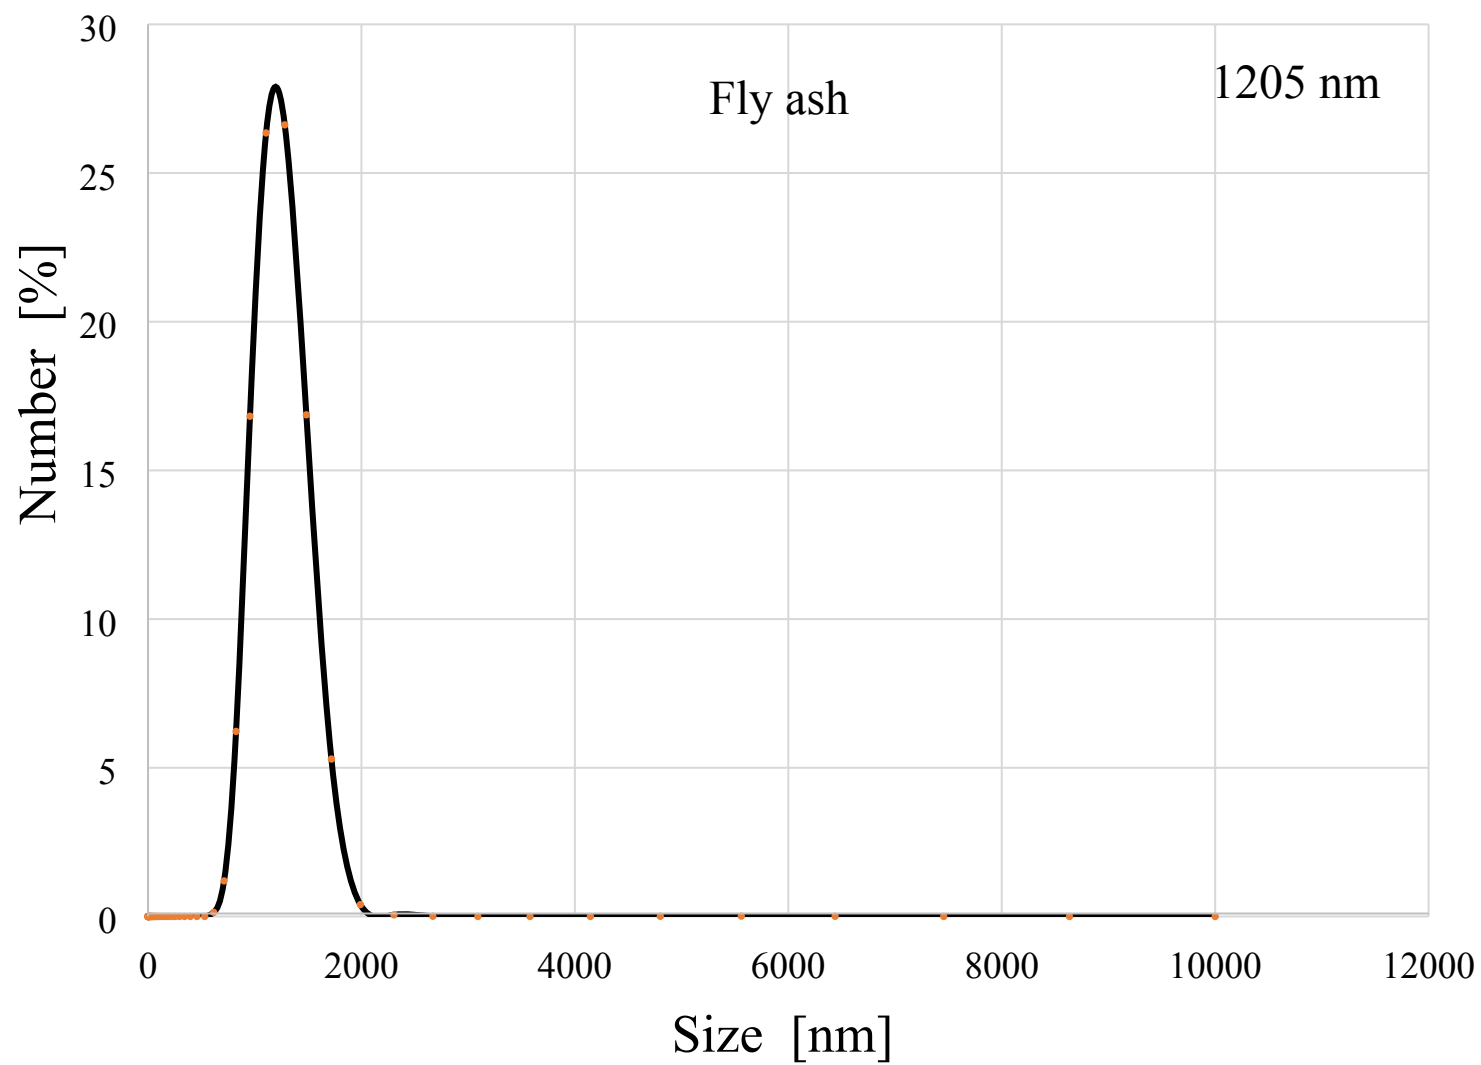

**Fig. SM1.** A plot of particle size distribution of CFBC fly ash

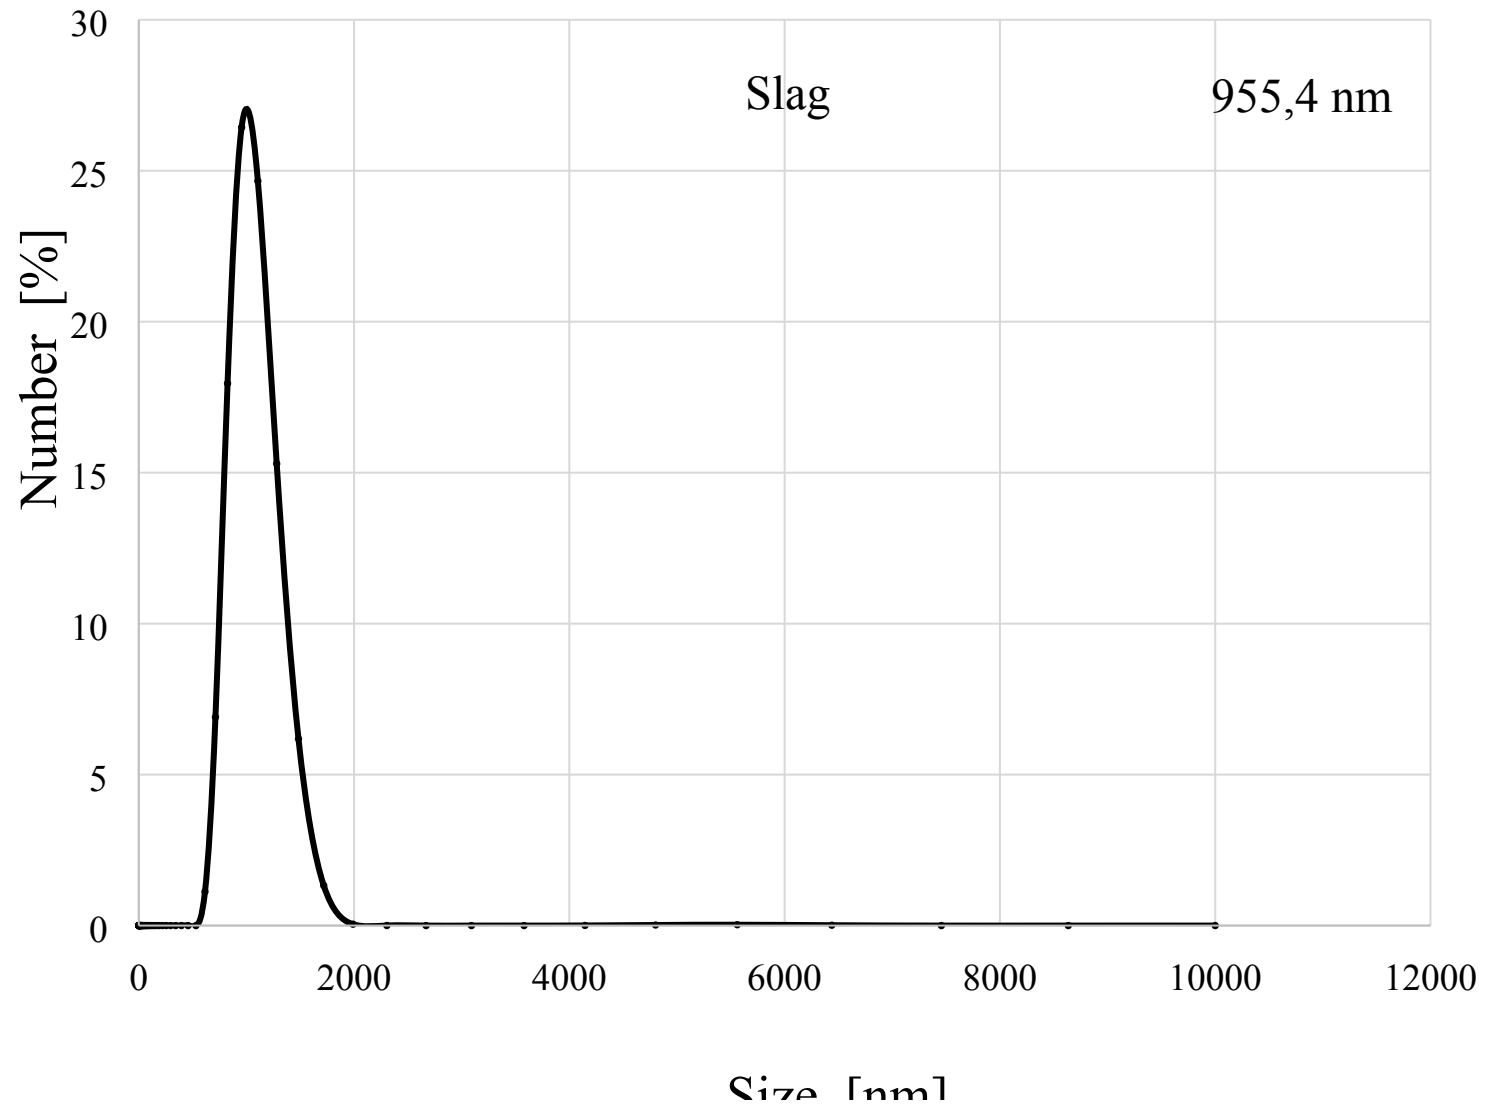

**Fig. SM2.** A plot of particle size distribution of CFBC slag

Full scale counts: 12785

Base(18)\_pt1

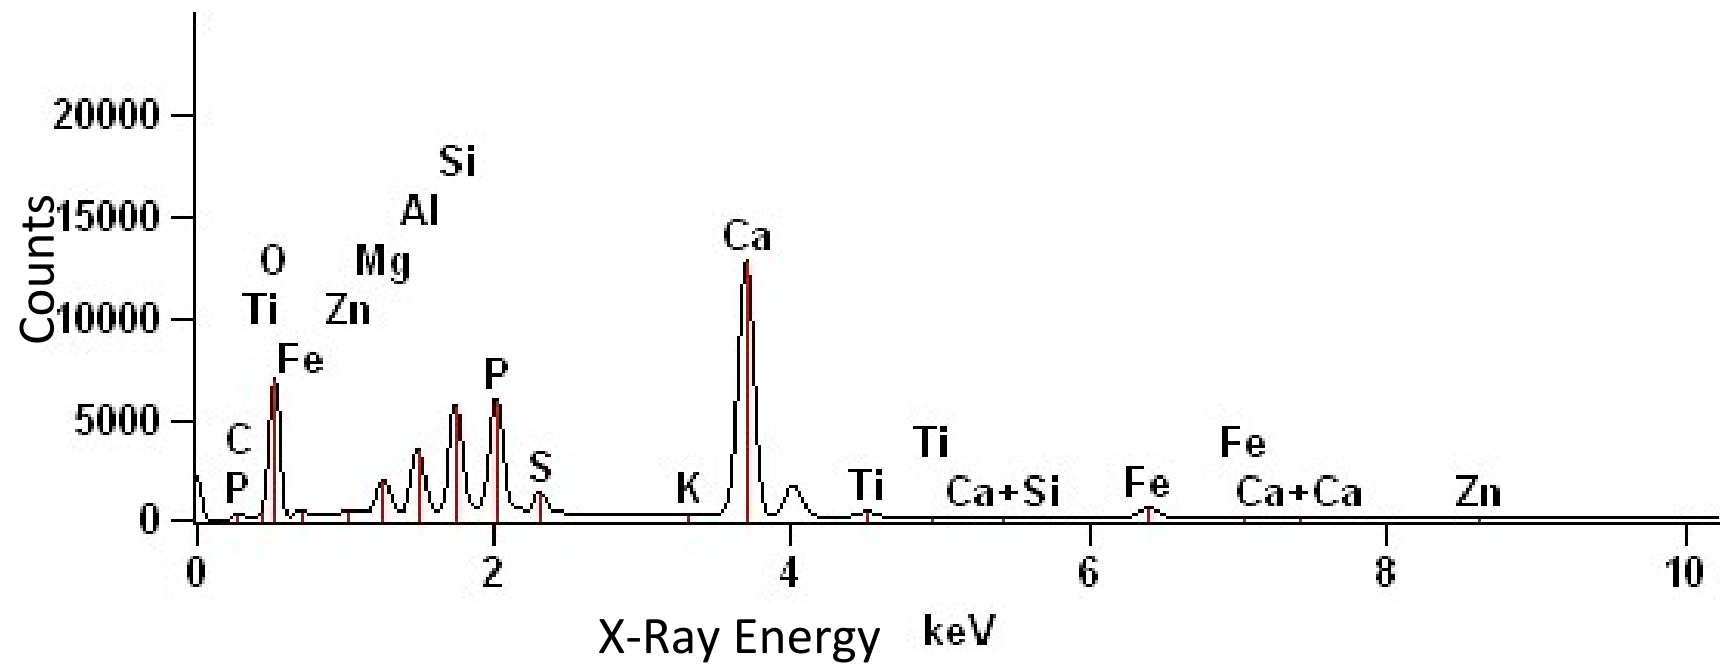

Fig. SM3. EDS spectrum of CFBC fly ash (magn. x200)

Full scale counts: 14929

Base(16)\_pt2

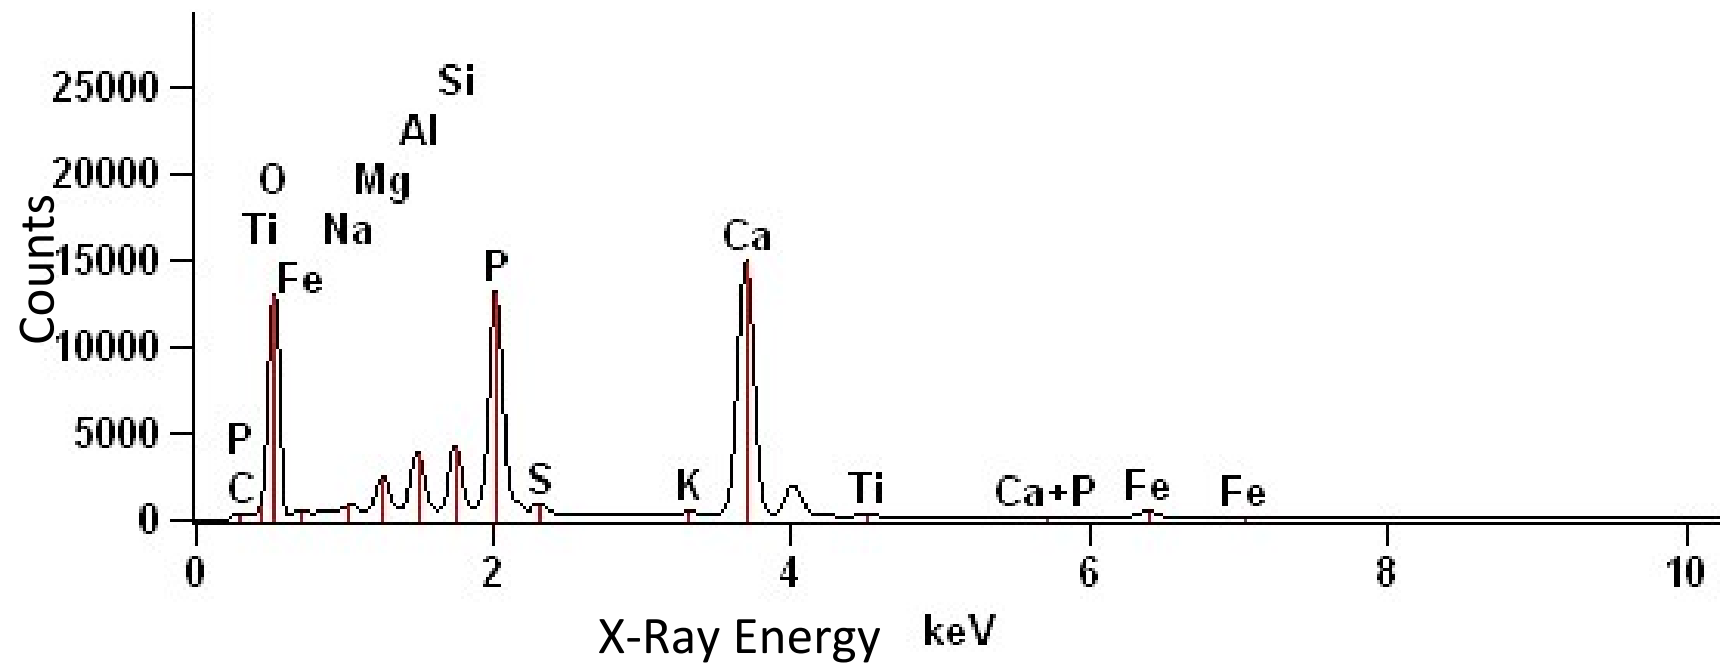

Fig. SM4. EDS spectrum of CFBC slag (magn. x200)

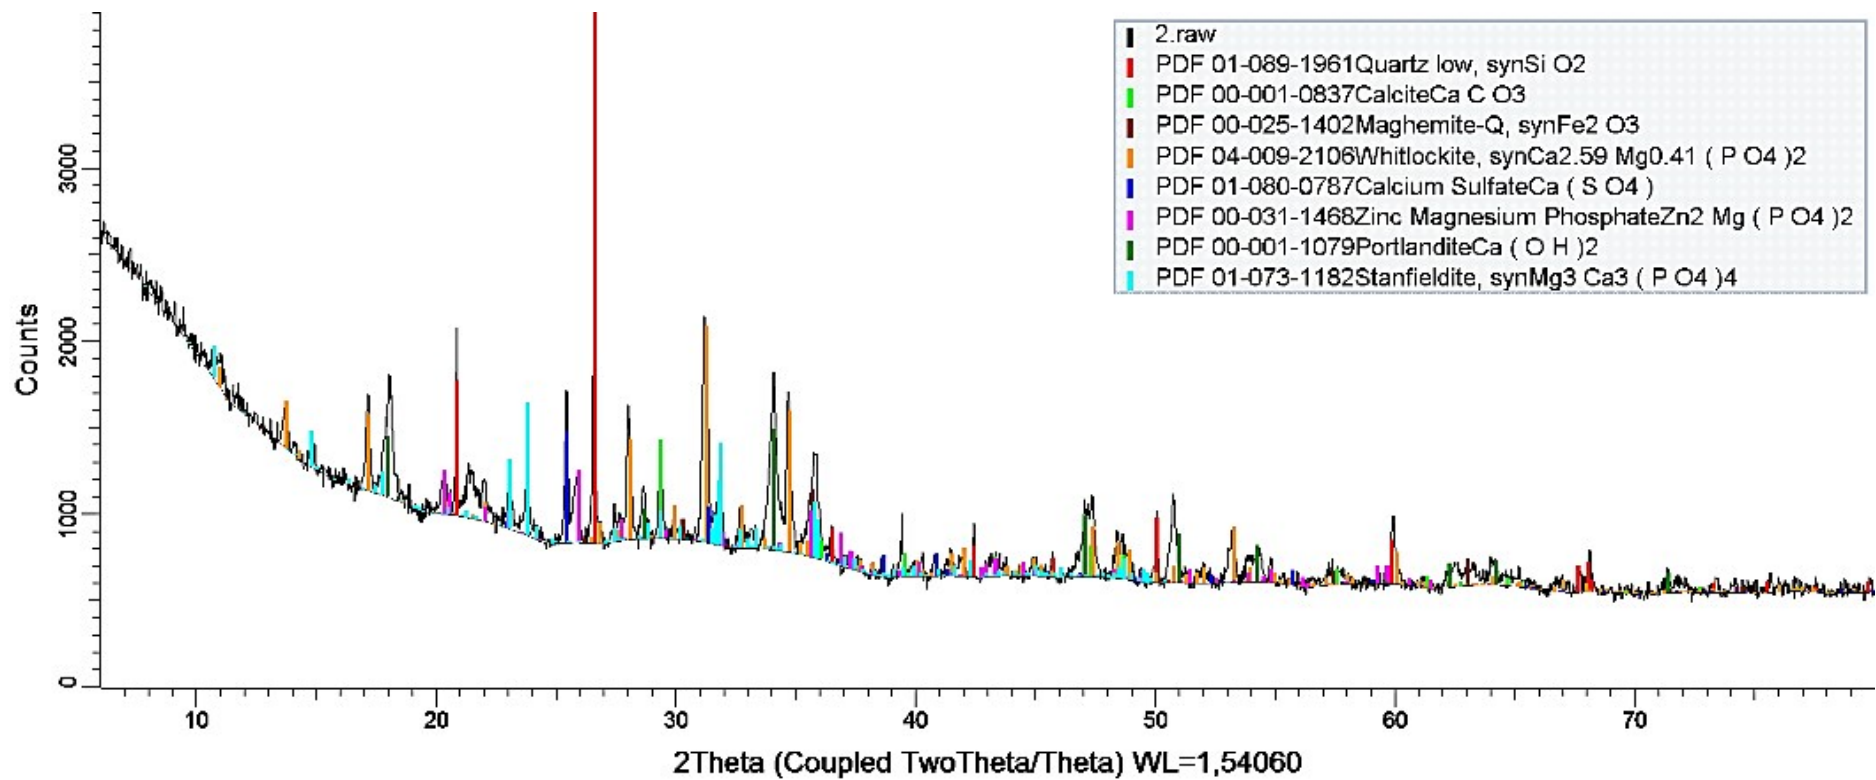

**Fig. SM5.** X-ray diffraction pattern of CFBC fly ash

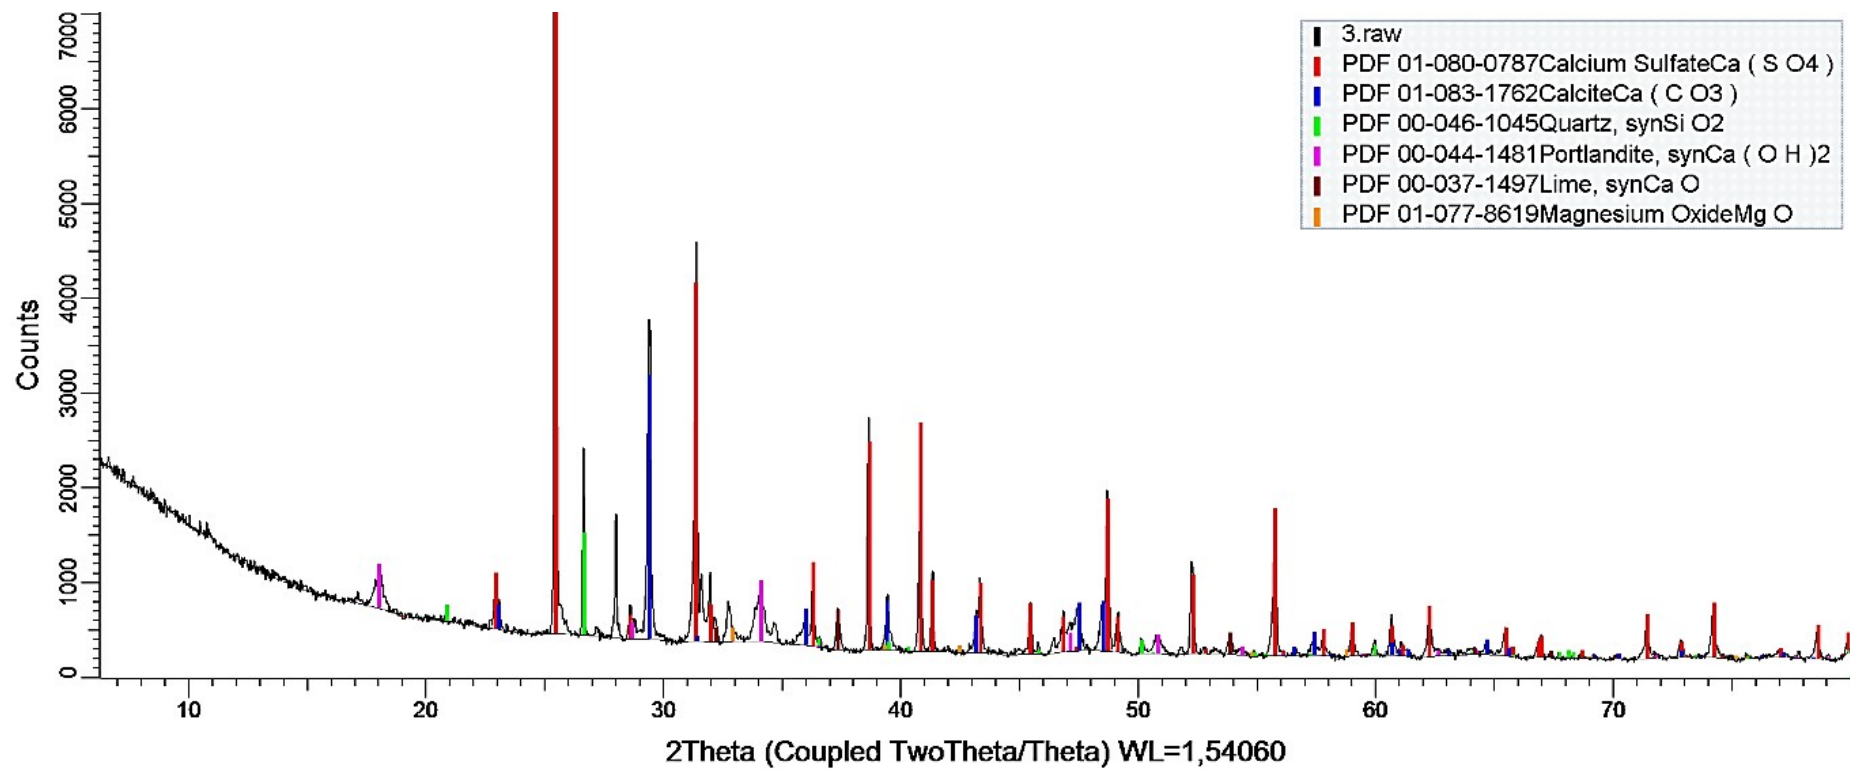

**Fig. SM6.** X-ray diffraction pattern of CFBC slag

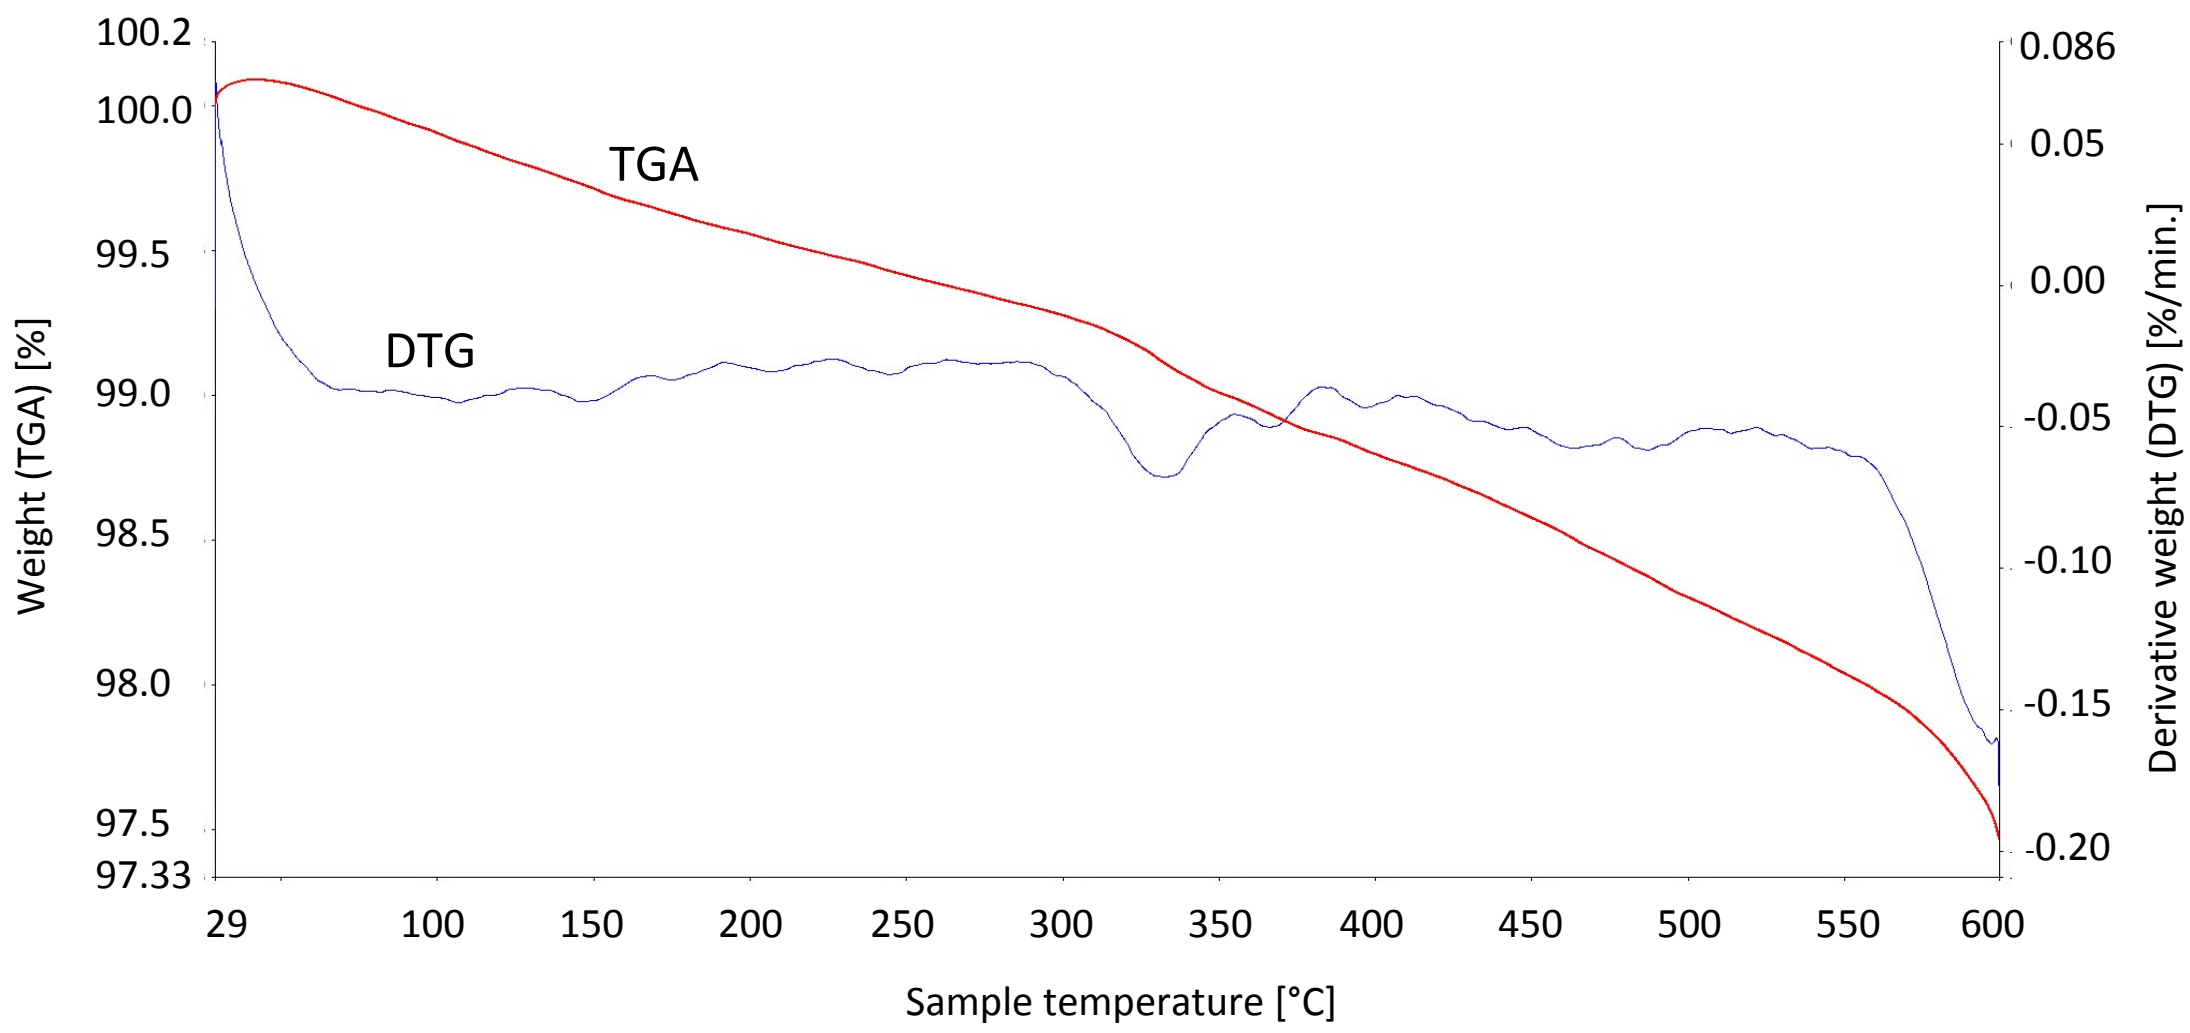

**Fig. SM7.** Thermogravimetric curves of CFBC fly ash

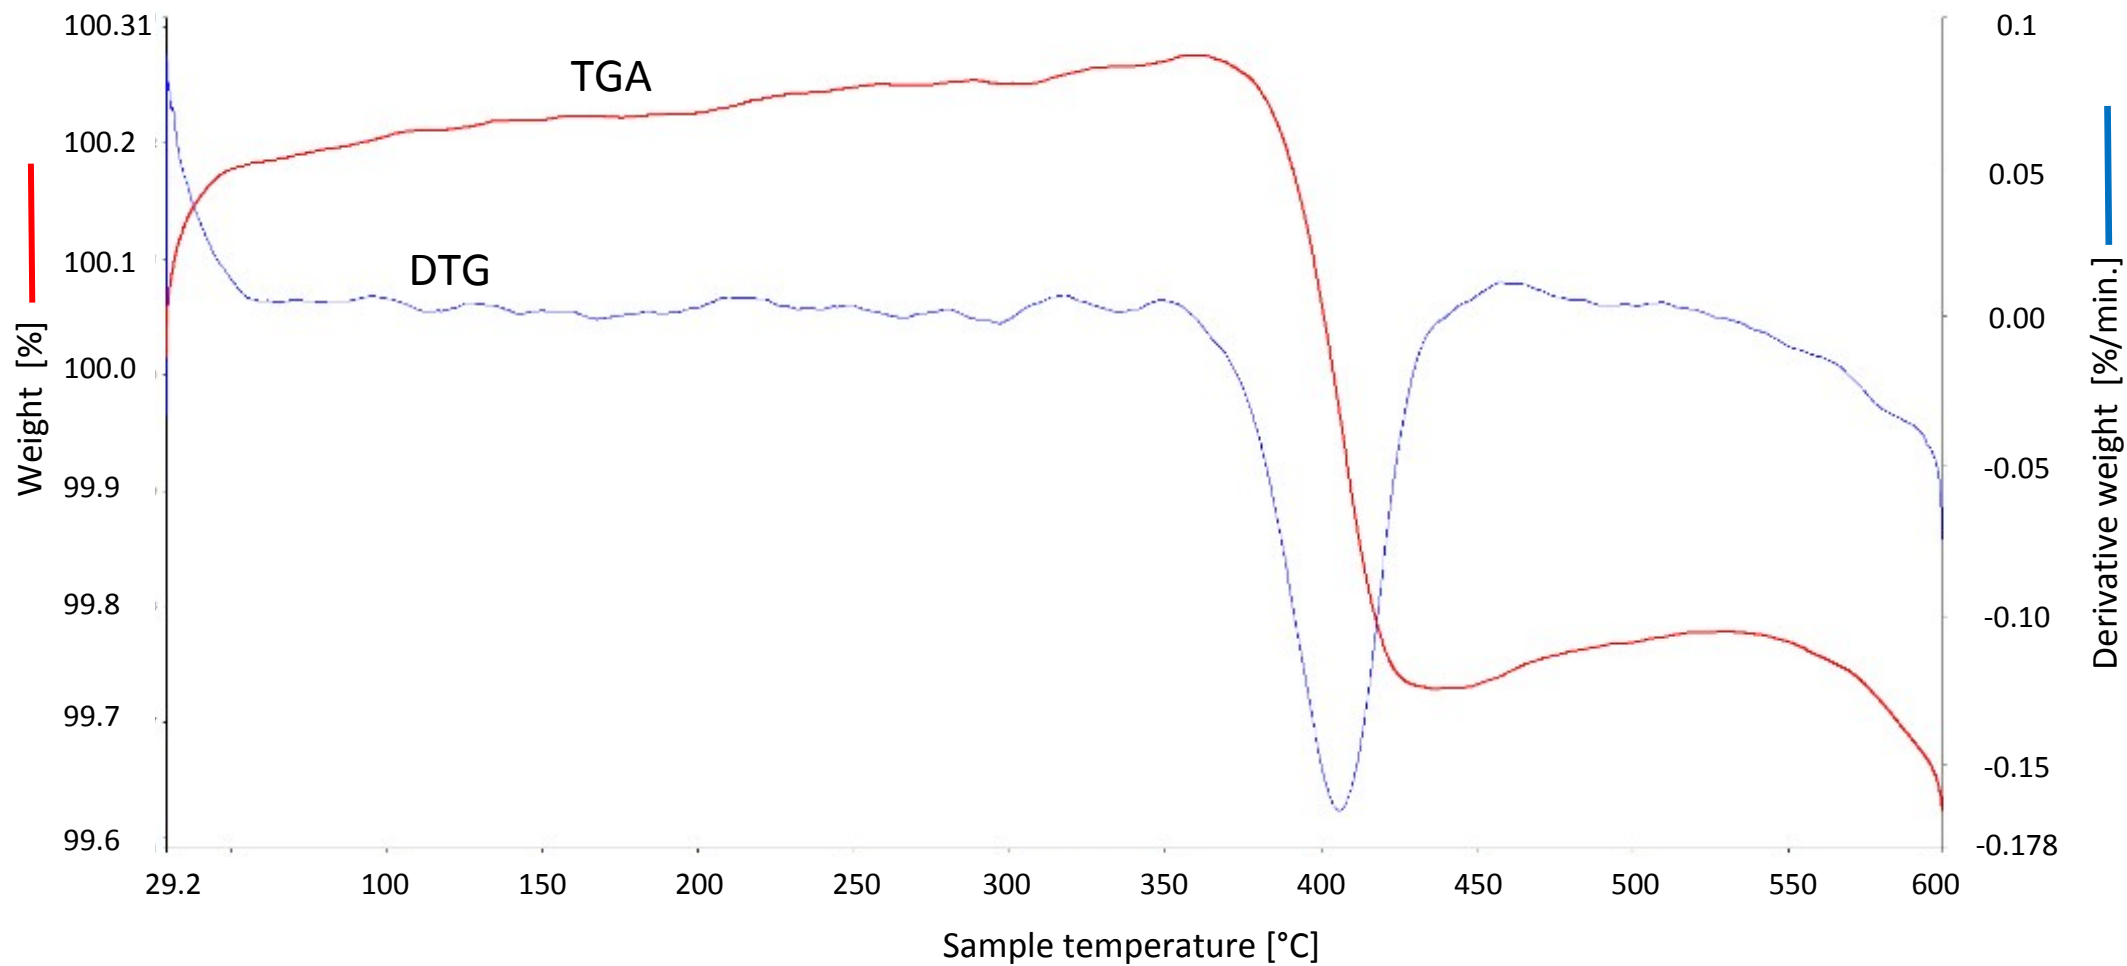

**Fig. SM8.** Thermogravimetric curves of CFBC slag



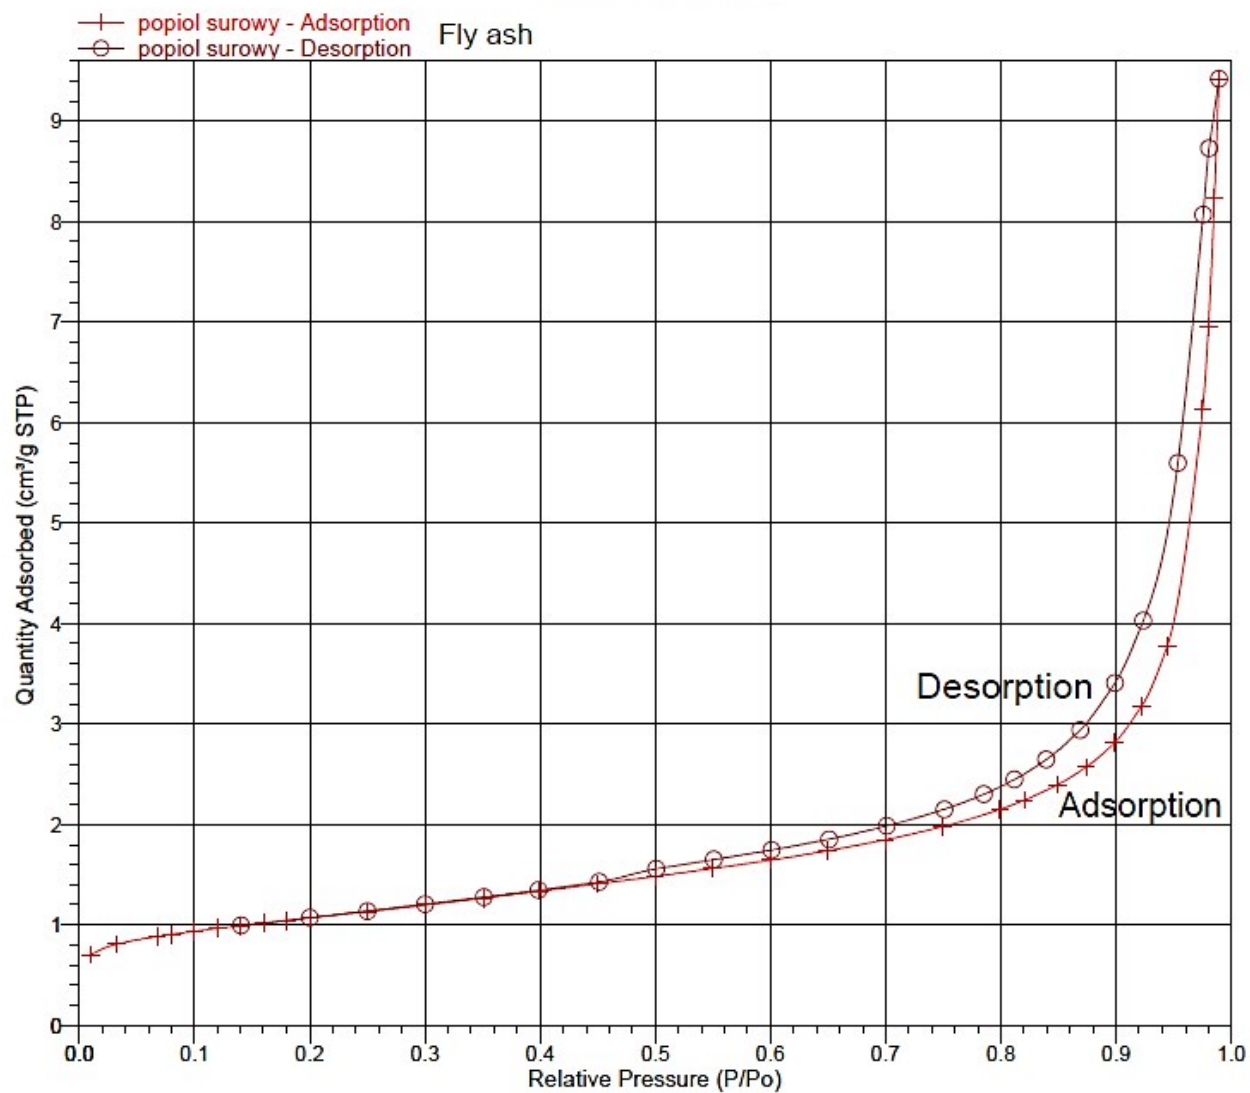

**Fig. SM9.** The low temperature BET adsorption and desorption isotherms of CFBC fly ash

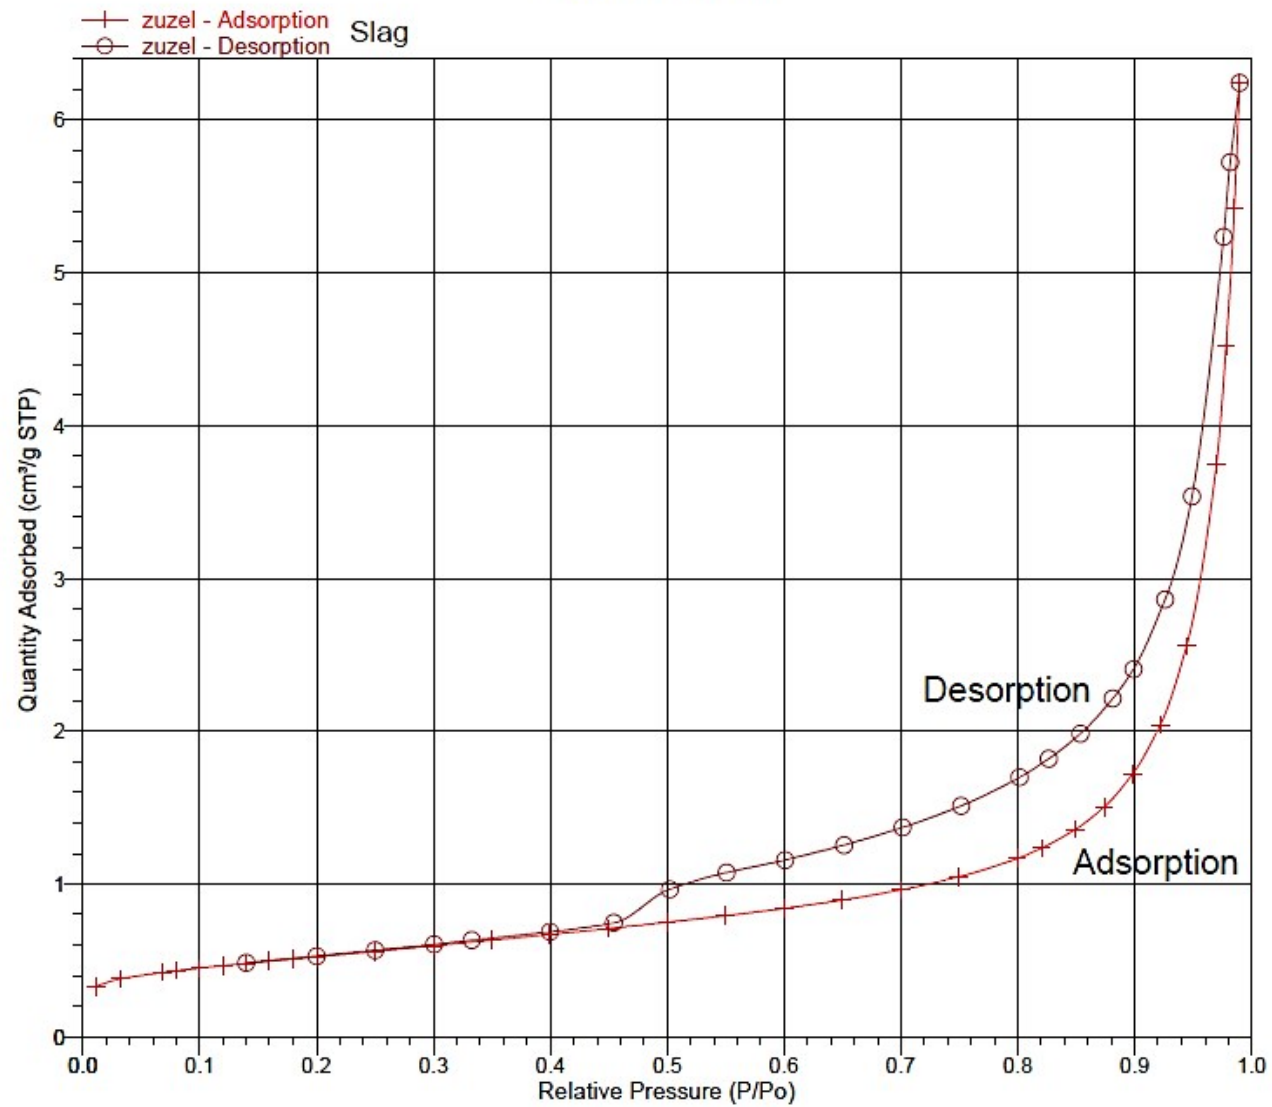

**Fig. SM10.** The low temperature BET adsorption and desorption isotherms of CFBC slag

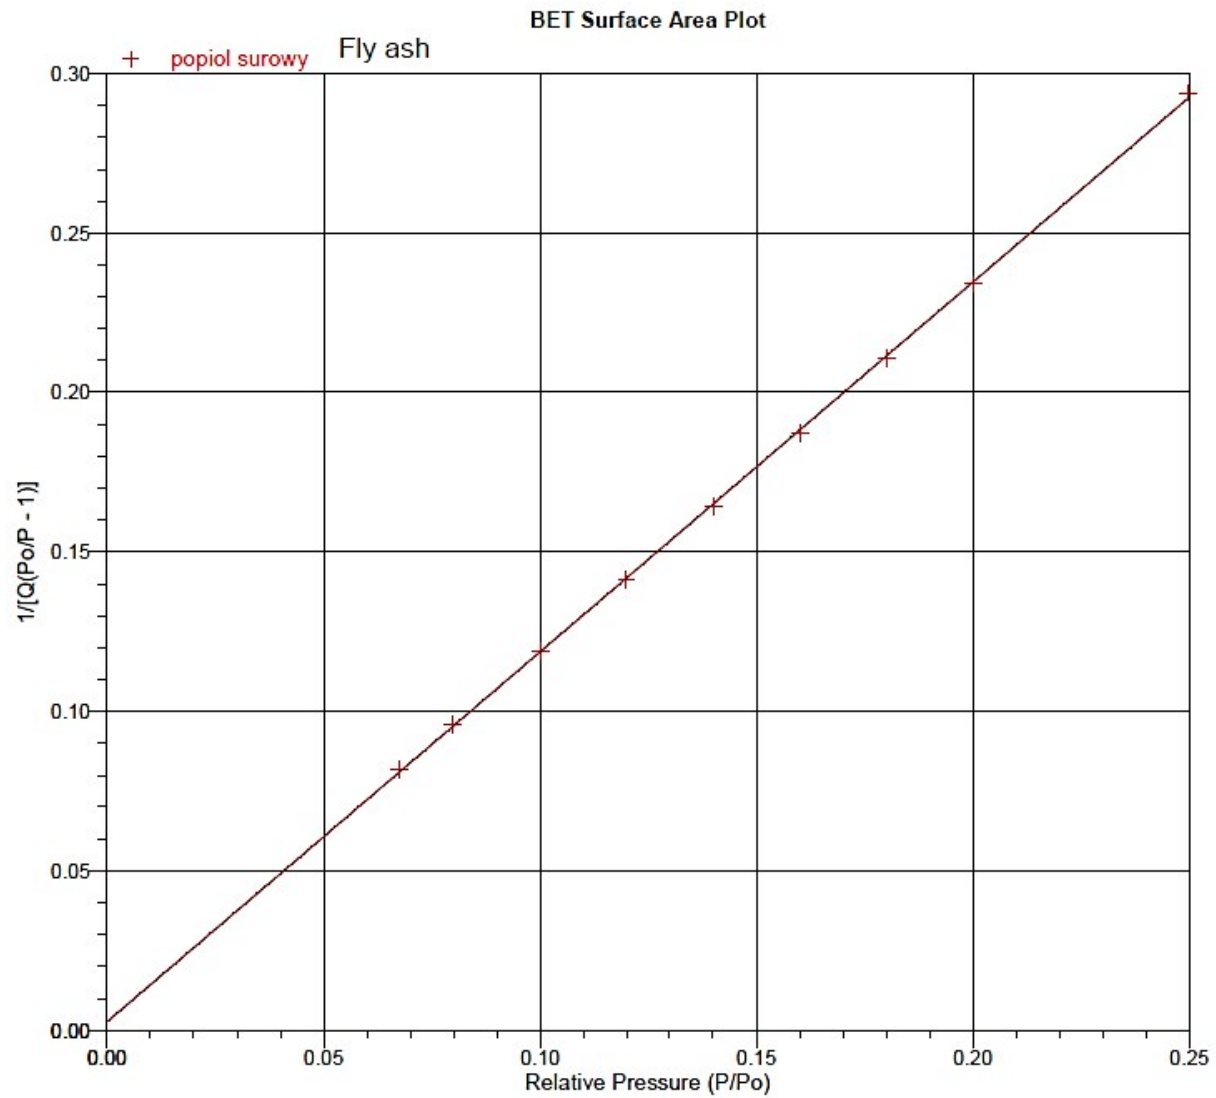

**Fig. SM11.** The linear BET isotherm of CFBC fly ash

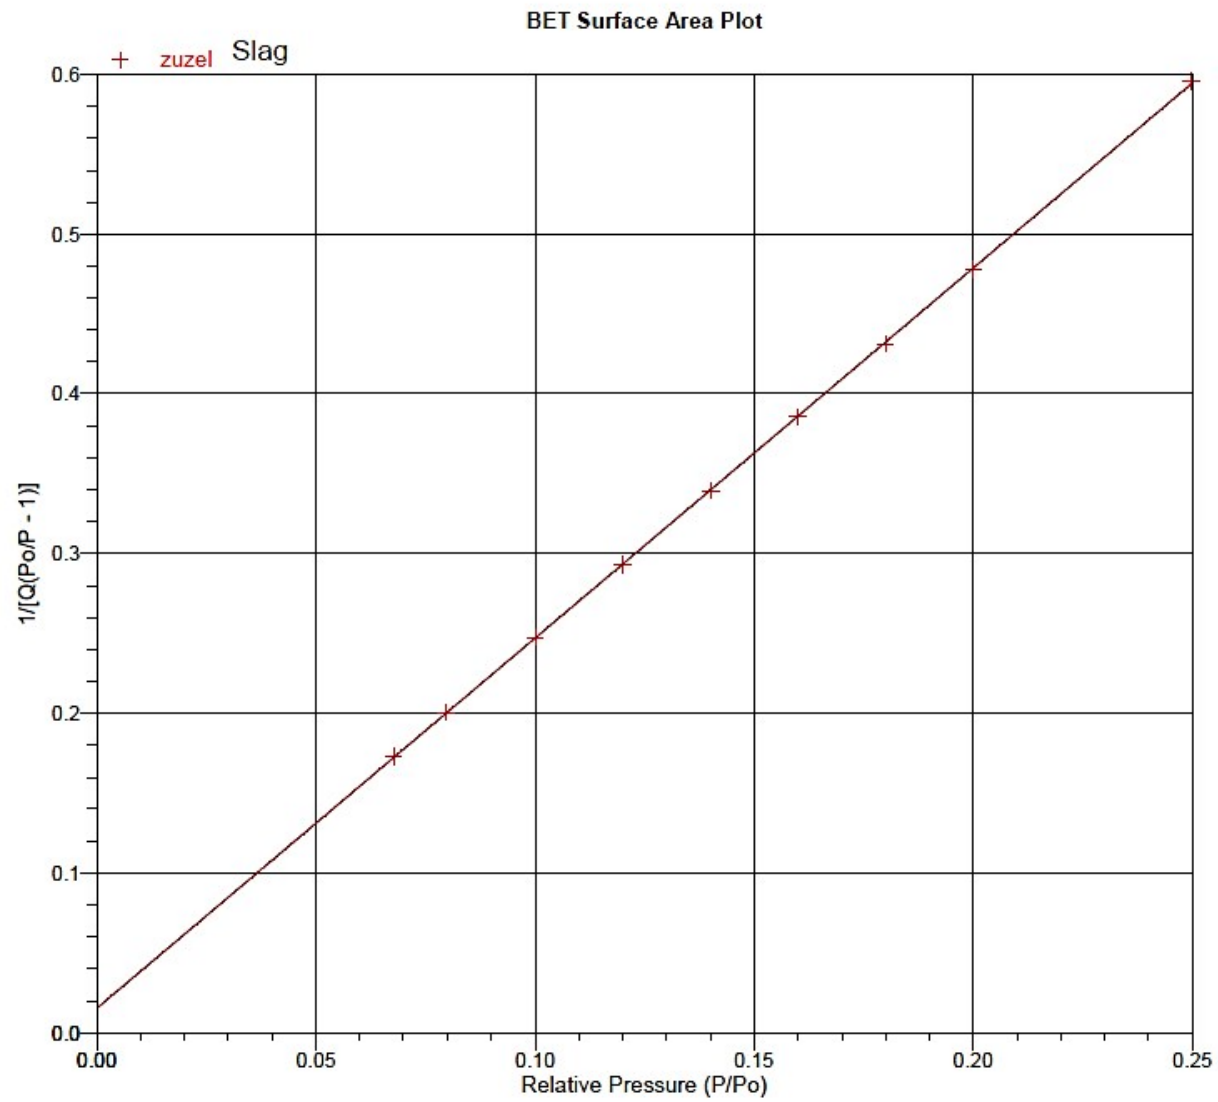

**Fig. SM12.** The linear BET isotherm of CFBC slag

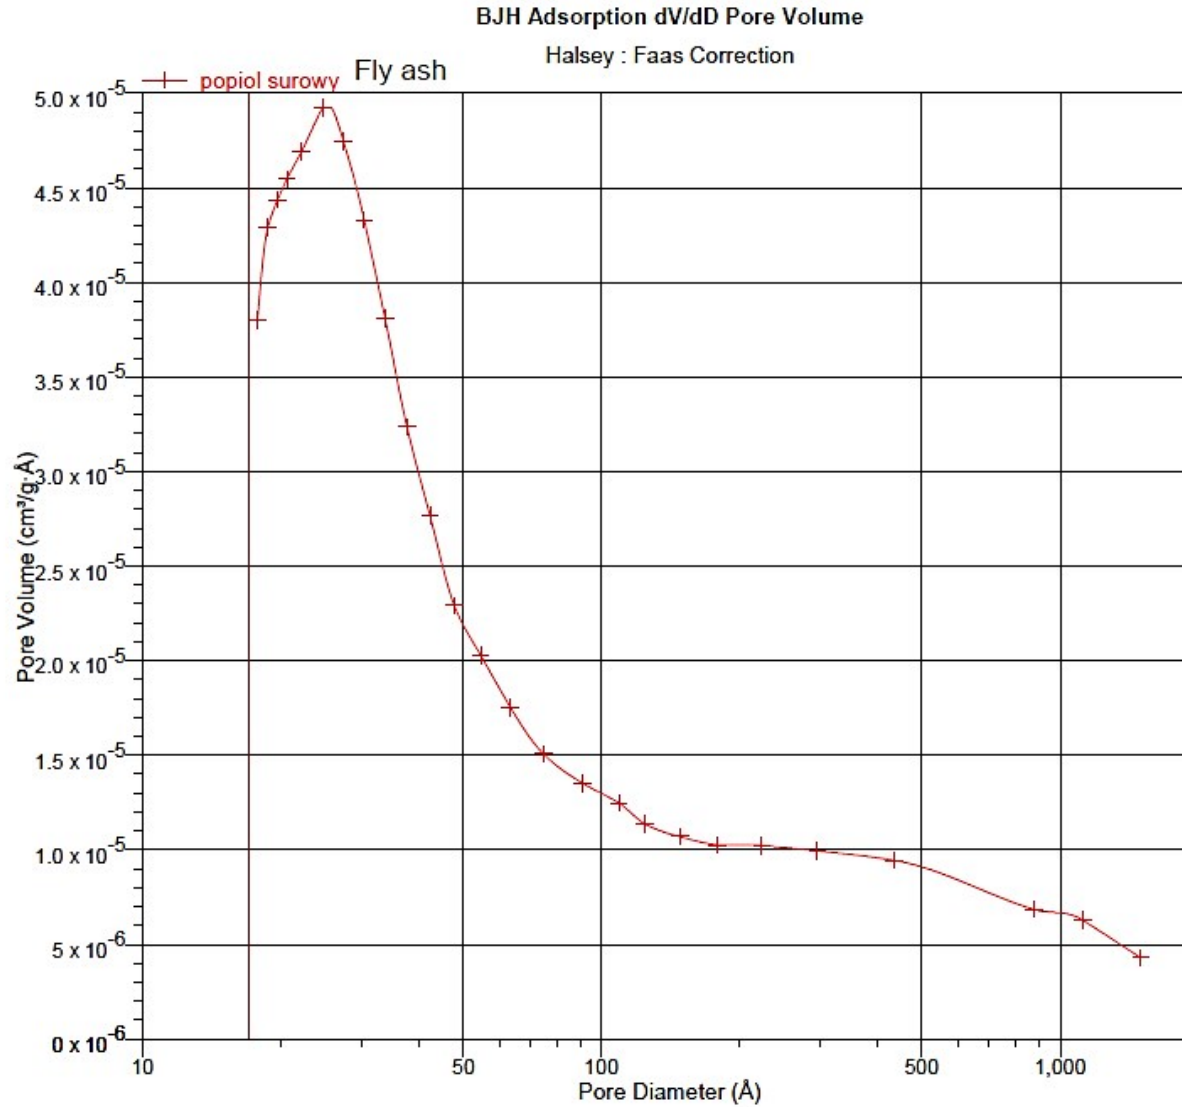

**Fig. SM13.** The BJH adsorption isotherm of CFBC fly ash

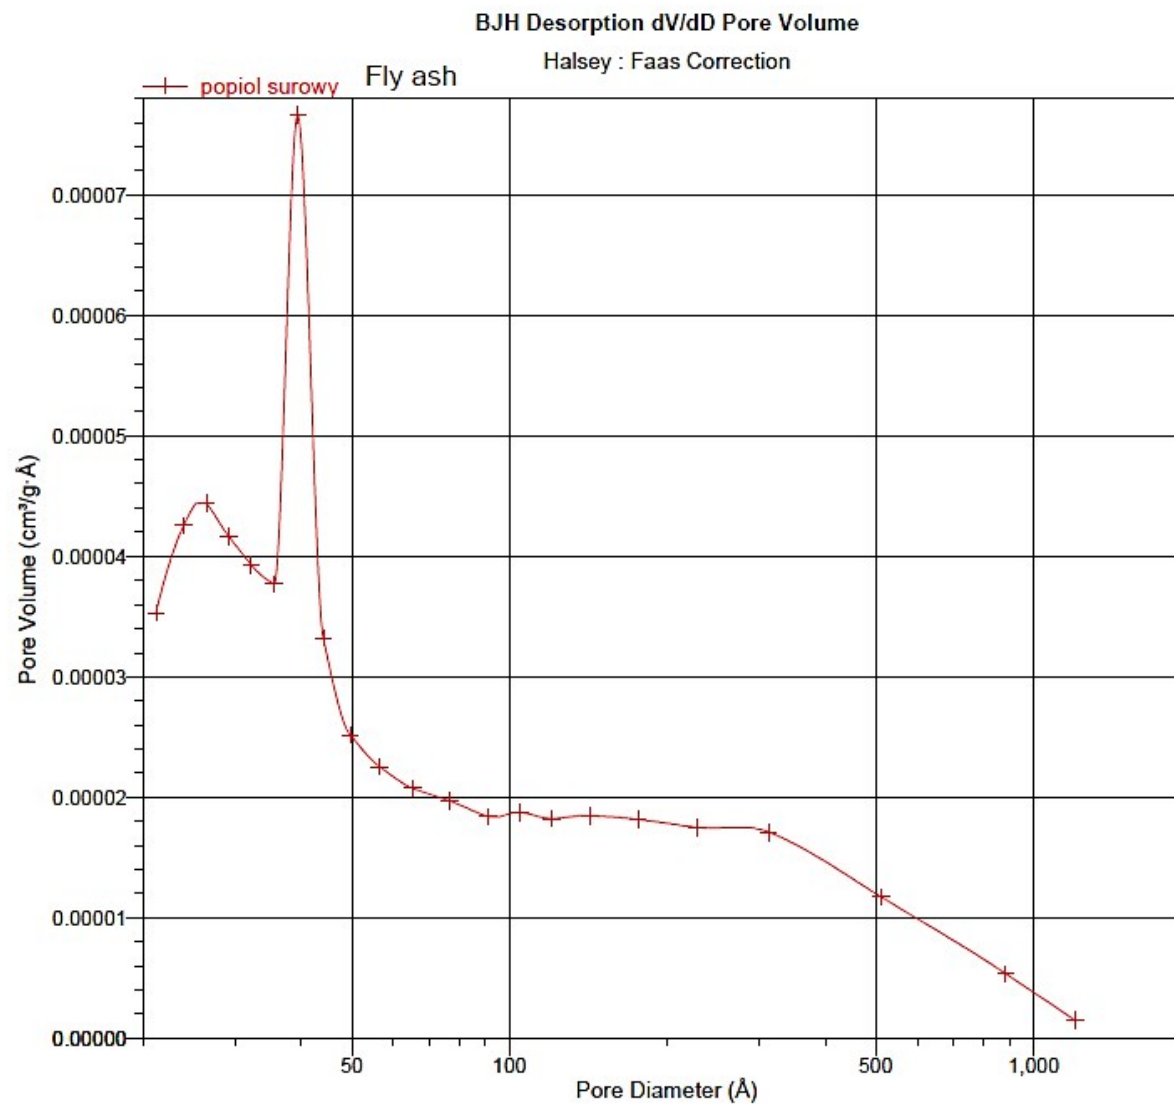

**Fig. SM14.** The BJH desorption isotherm of CFBC fly ash

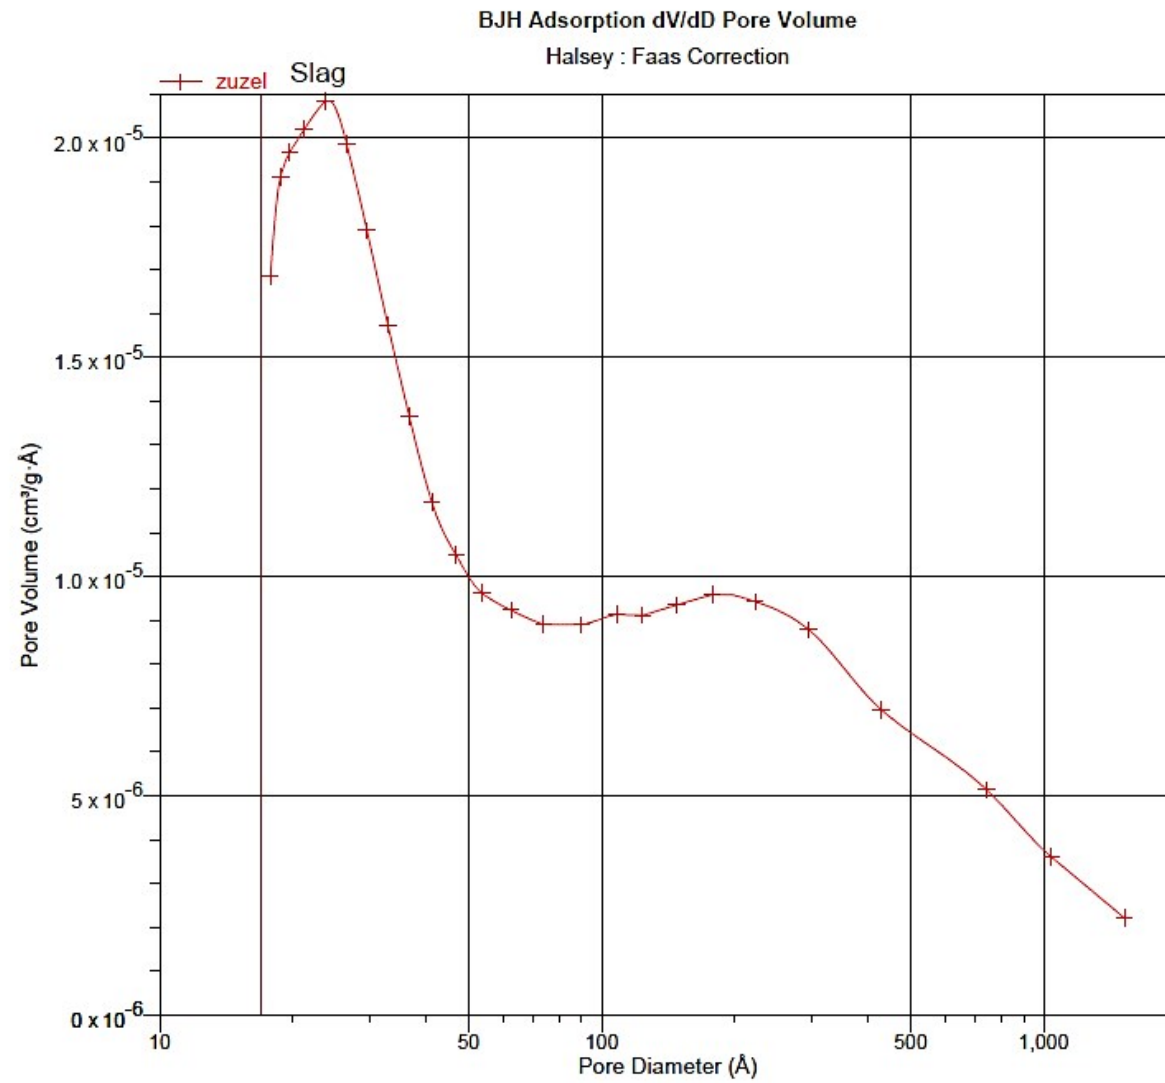

**Fig. SM15.** The BJH adsorption isotherm of CFBC slag

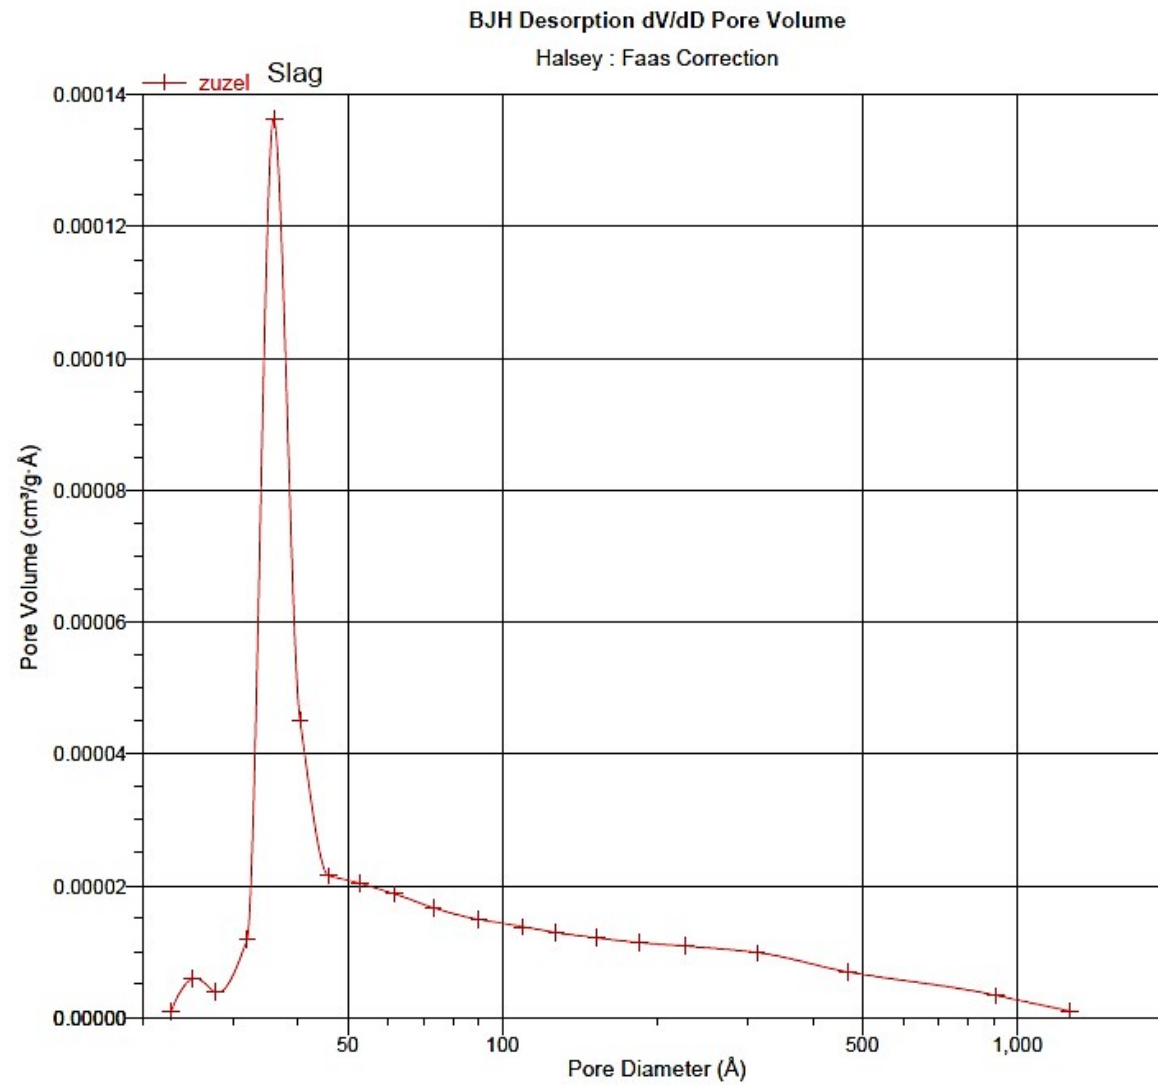

**Fig. SM16.** The BJH desorption isotherm of CFBC slag
